# Supplementary material for: New Benzenoid Derivatives and Other Constituents from Lawsonia inermis with Inhibitory Activity against NO Production
Source: PubMed Central journal article supplement (PMC6152715; doi:10.3390/molecules22060936), 2017-06-05
Supplement: molecules-22-00936-s001.pdf [file molecules-22-00936-s001.pdf]

## Supplementary Materials

### New Benzenoid Derivatives and other Constituents from *Lawsonia inermis* with Inhibitory Activity against NO Production

Chang-Syun Yang <sup>1,†</sup>, Jih-Jung Chen <sup>2,3,†</sup>, Hui-Chi Huang <sup>1</sup>, Guan-Jhong Huang <sup>1,†</sup>, Sheng-Yang Wang <sup>4,5</sup>, Ping-Jyun Sung <sup>6</sup>, Ming-Jen Cheng <sup>7</sup>, Ming-Der Wu <sup>7</sup>, Yueh-Hsiung Kuo <sup>1,8,\*</sup>

- 1 Department of Chinese Pharmaceutical Sciences and Chinese Medicine Resources, China Medical University, Taichung 404, Taiwan; tim.tim0619@msa.hinet.net (C.-S.Y.); hchuang@mail.cmu.edu.tw (H.-C.H.); gjhuang@mail.cmu.edu.tw (G.-J.H.); kuoyh@mail.cmu.edu.tw (Y.-H. K.)
  - 2 Faculty of Pharmacy, School of Pharmaceutical Sciences, National Yang-Ming University, Taipei 112, Taiwan; chenjj@ym.edu.tw (J.-J. C.)
  - 3 Department of Medical Research, China Medical University Hospital, China Medical University, Taichung 404, Taiwan
  - 4 Department of Forestry, National Chung-Hsing University, Taichung 402, Taiwan; taiwanfir@dragon.nchu.edu.tw
  - 5 Agricultural Biotechnology Research Center, Academia Sinica, Taipei 115, Taiwan
  - 6 National Museum of Marine Biology and Aquarium, Pingtung 944, Taiwan; pjsung@nmmba.gov.tw
  - 7 Food Industry Research and Development Institute, Hsinchu, 300, Taiwan; low463@gmail.com (M.-J.C); wmd@firdi.org.tw (M.-D.W)
  - 8 Department of Biotechnology, Asia University, Taichung 413, Taiwan
- \* Correspondence: kuoyh@mail.cmu.edu.tw; Tel.: +886-4-2205-3366 (ext. 5701); Fax: +886-4-2207-1693  
† These authors contributed equally to this work.

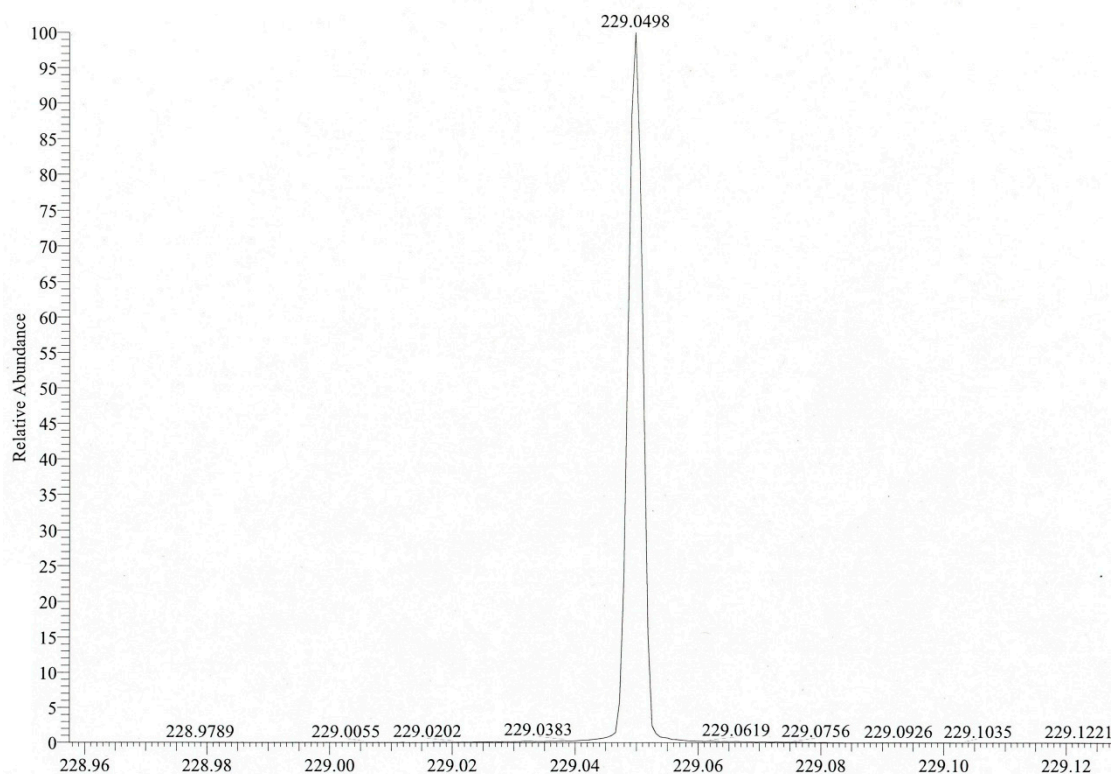

Fig. S1. HR-ESI-MS spectrum of 1.

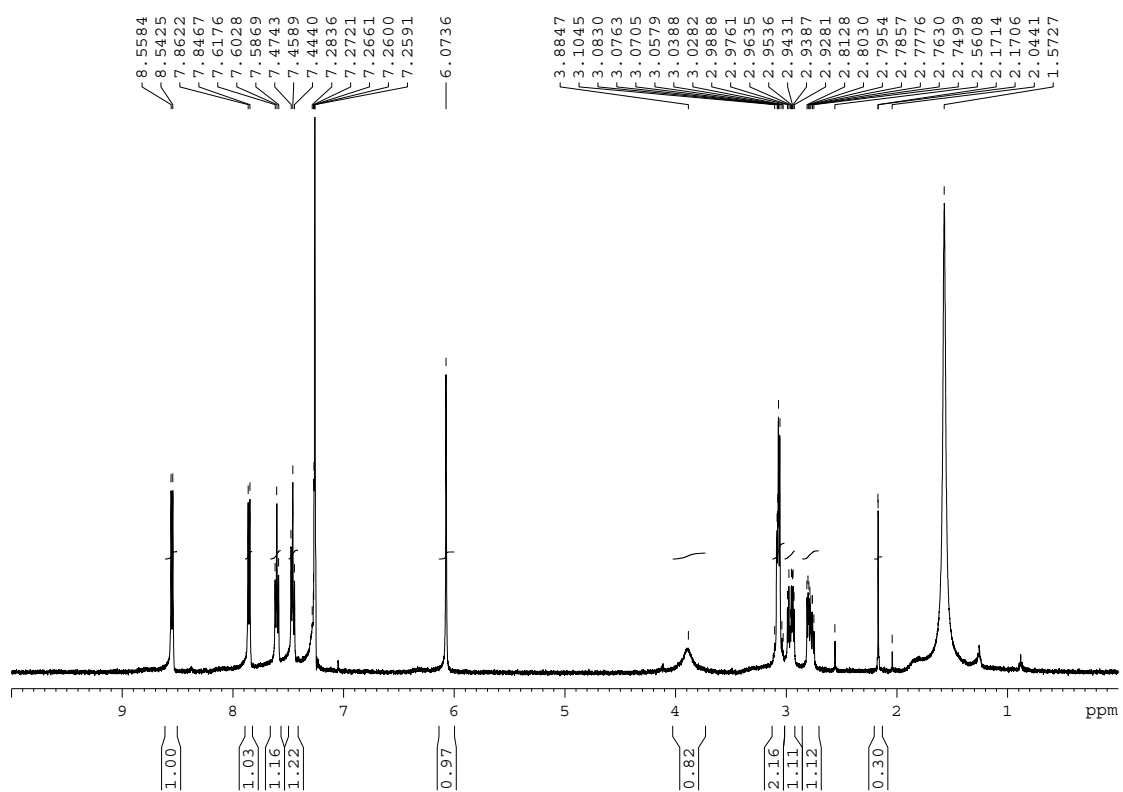

**Fig. S2.**  $^1\text{H-NMR}$  spectrum of **1** ( $\text{CDCl}_3$ , 500 MHz).

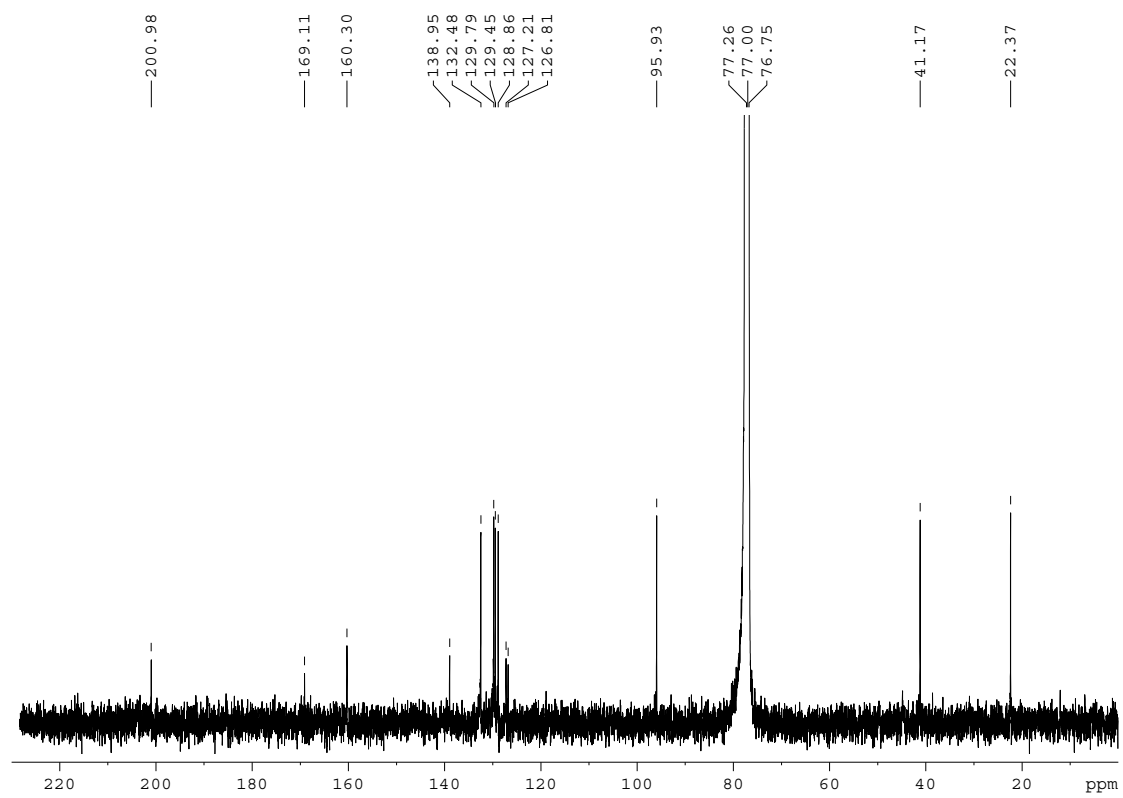

**Fig. S3.**  $^{13}\text{C-NMR}$  spectrum of **1** ( $\text{CDCl}_3$ , 125 MHz).

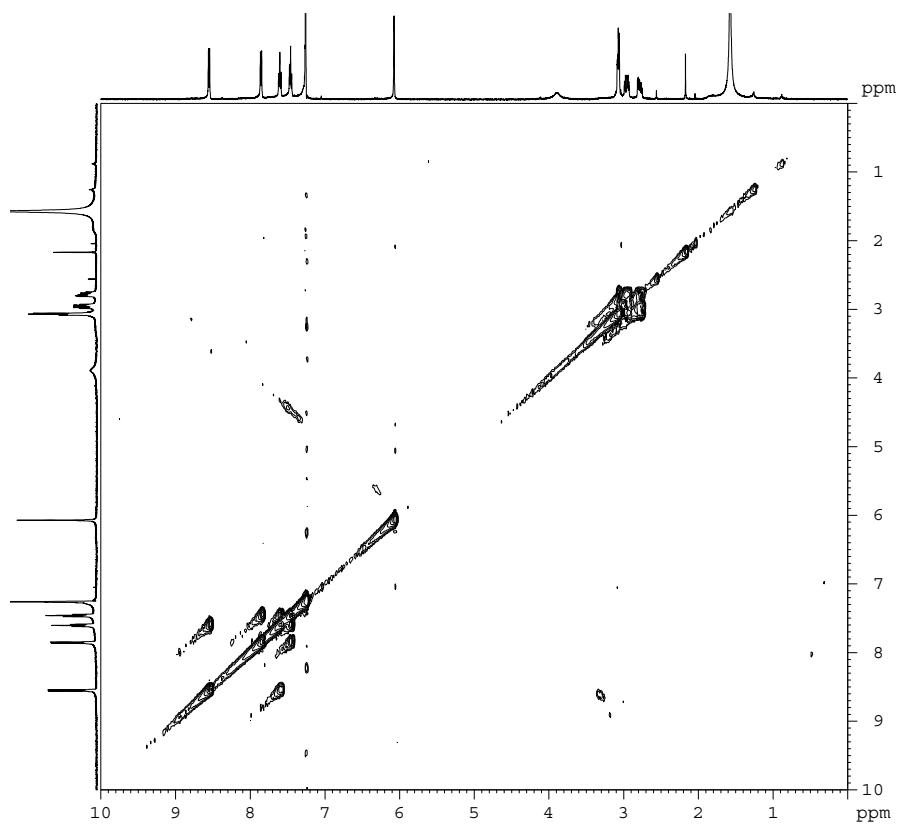

Fig. S4.  $^1\text{H}$ - $^1\text{H}$  COSY spectrum of **1**.

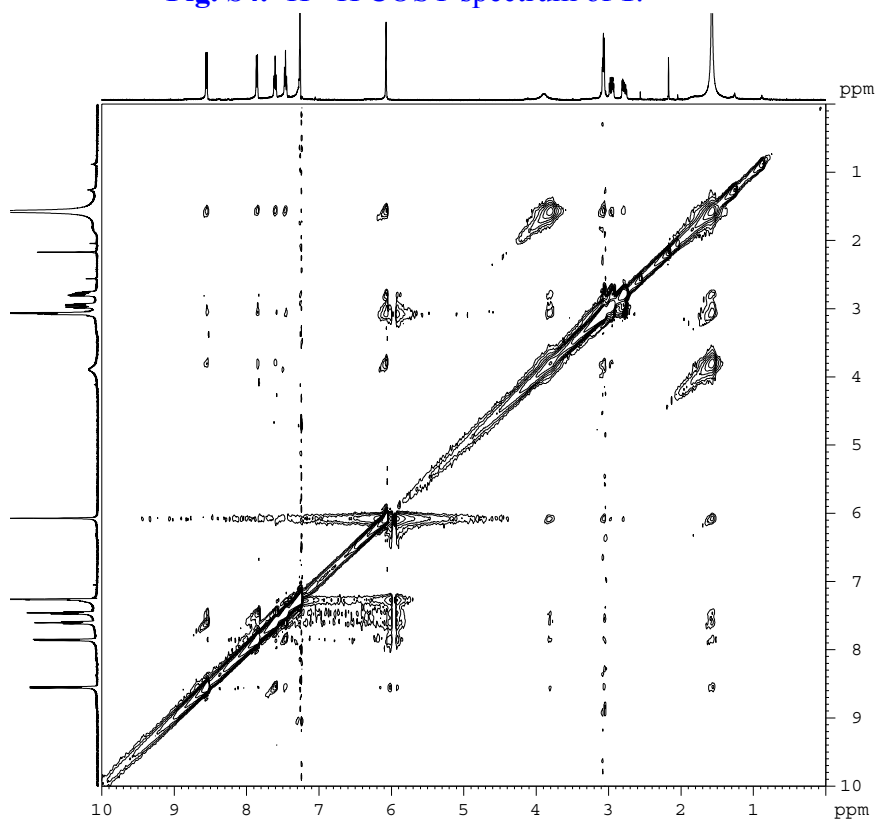

Fig. S5. NOESY spectrum of **1**.

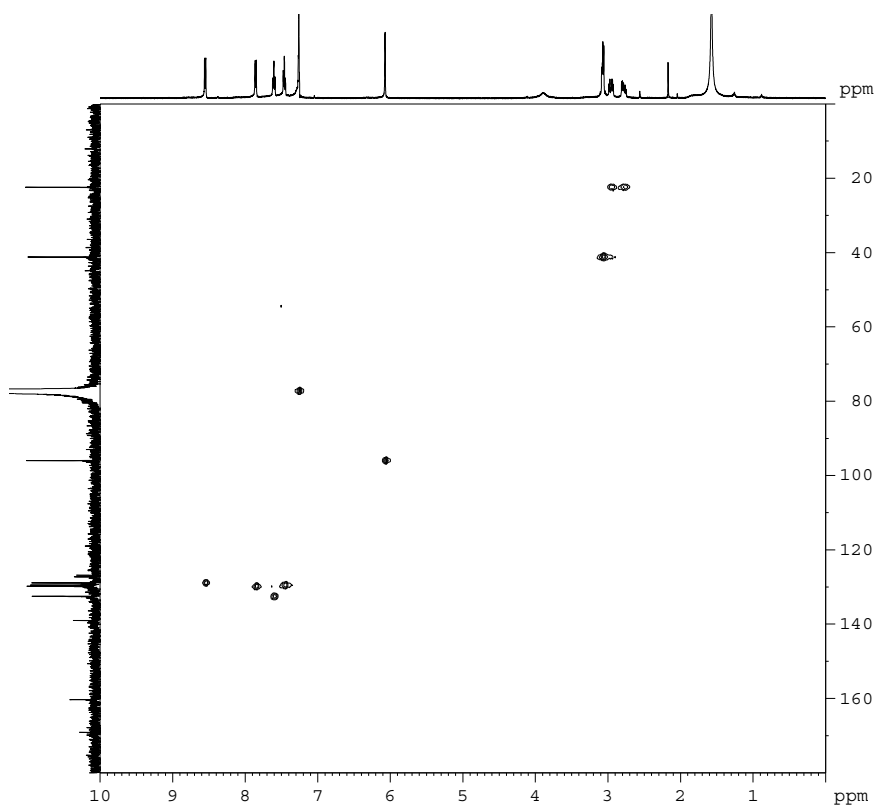

**Fig. S6.** HSQC spectrum of **1**.

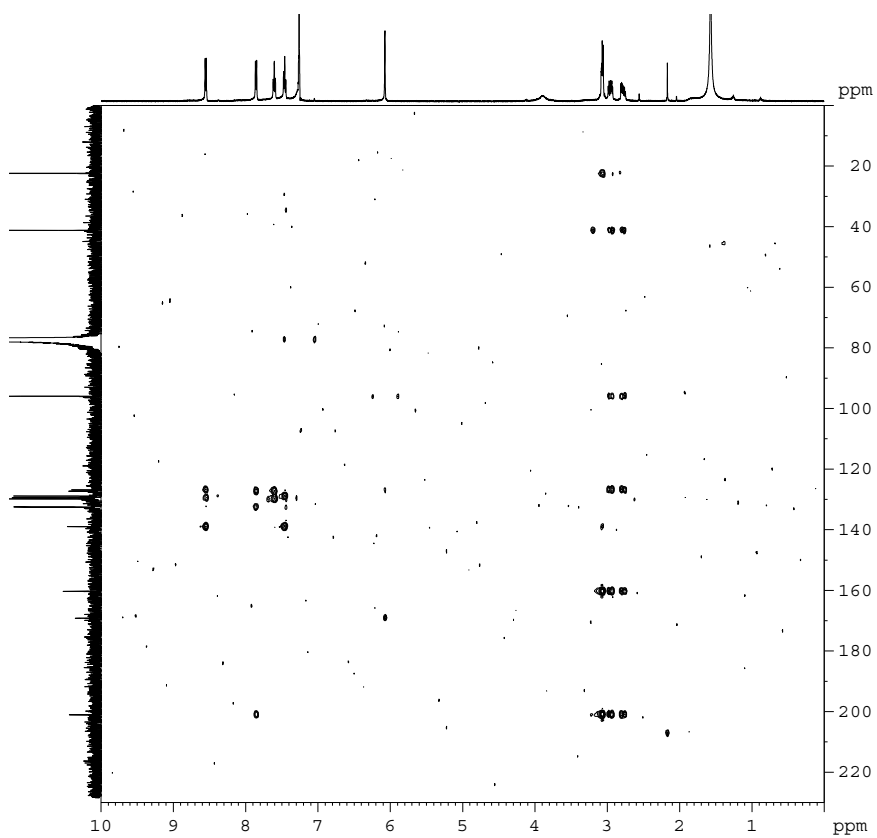

**Fig. S7.** HMBC spectrum of **1**.

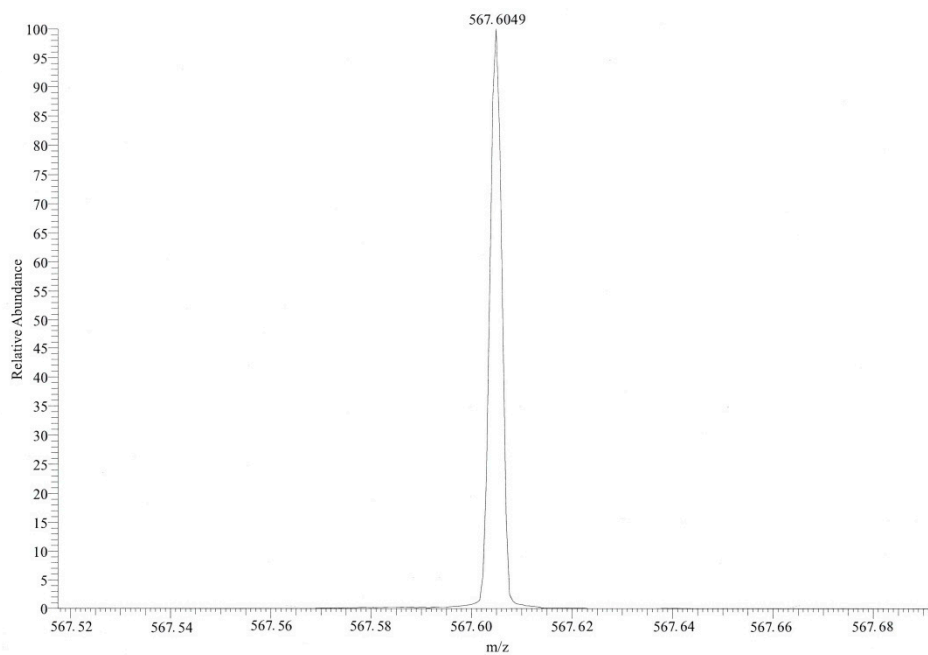

**Fig. S8.** HR-ESI-MS spectrum of **2**.

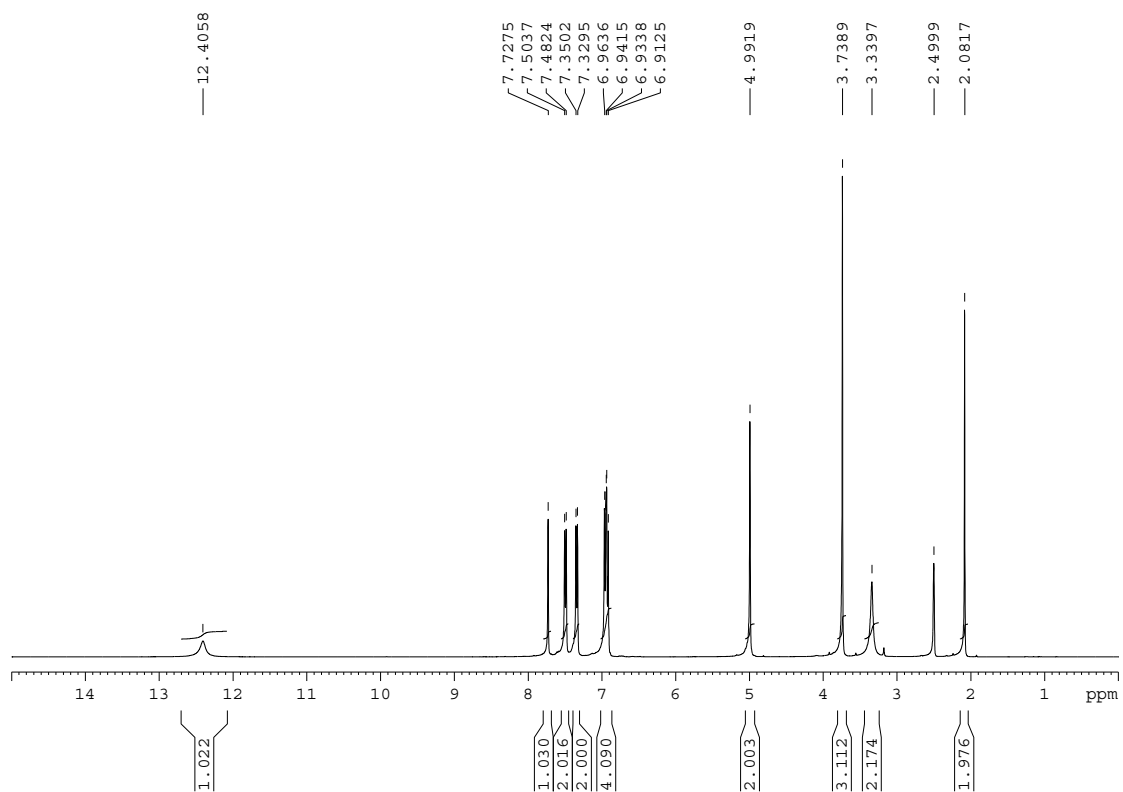

**Fig. S9.** <sup>1</sup>H-NMR spectrum of **2** (CDCl<sub>3</sub>, 400 MHz).

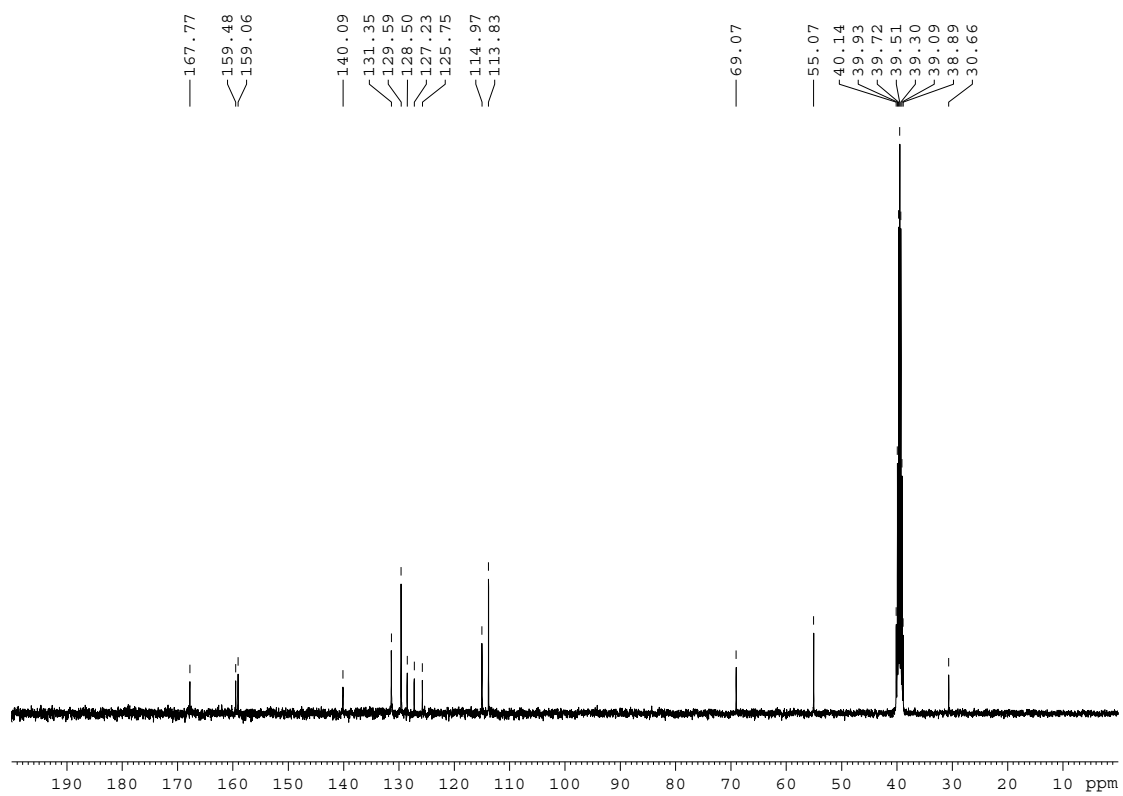

**Fig. S10.**  $^{13}\text{C}$ -NMR spectrum of **2** ( $\text{CDCl}_3$ , 100 MHz).

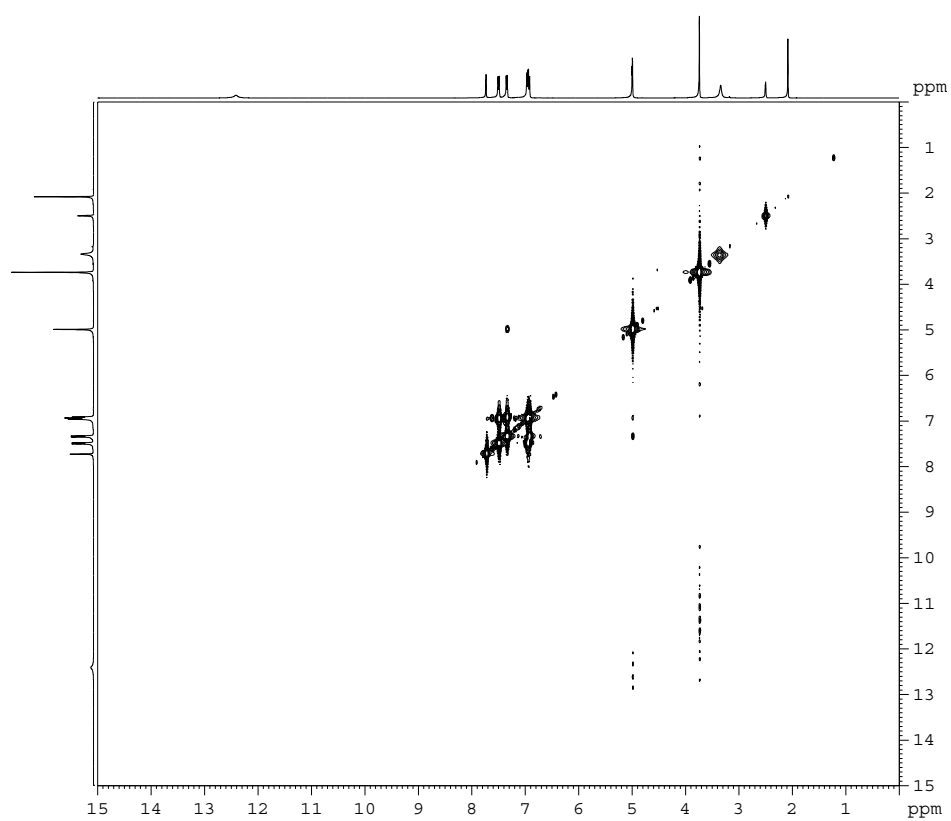

**Fig. S11.**  $^1\text{H}$ - $^1\text{H}$  COSY spectrum of **2**.

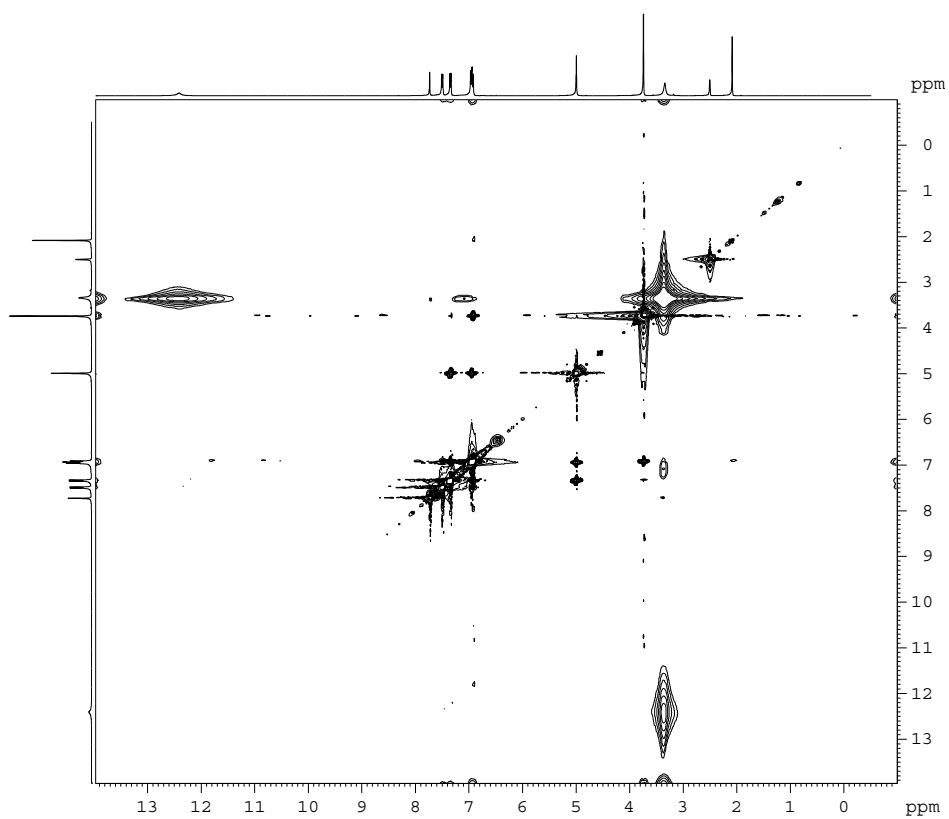

**Fig. S12.** NOESY spectrum of **2**.

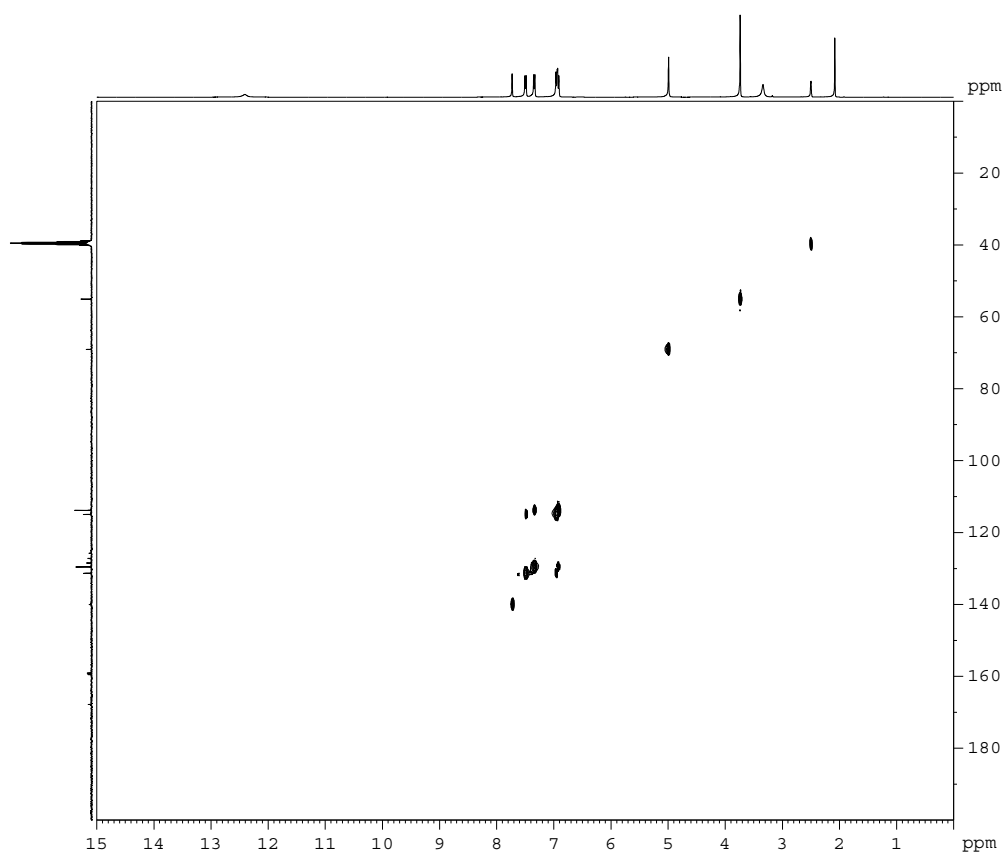

**Fig. S13.** HSQC spectrum of **2**.

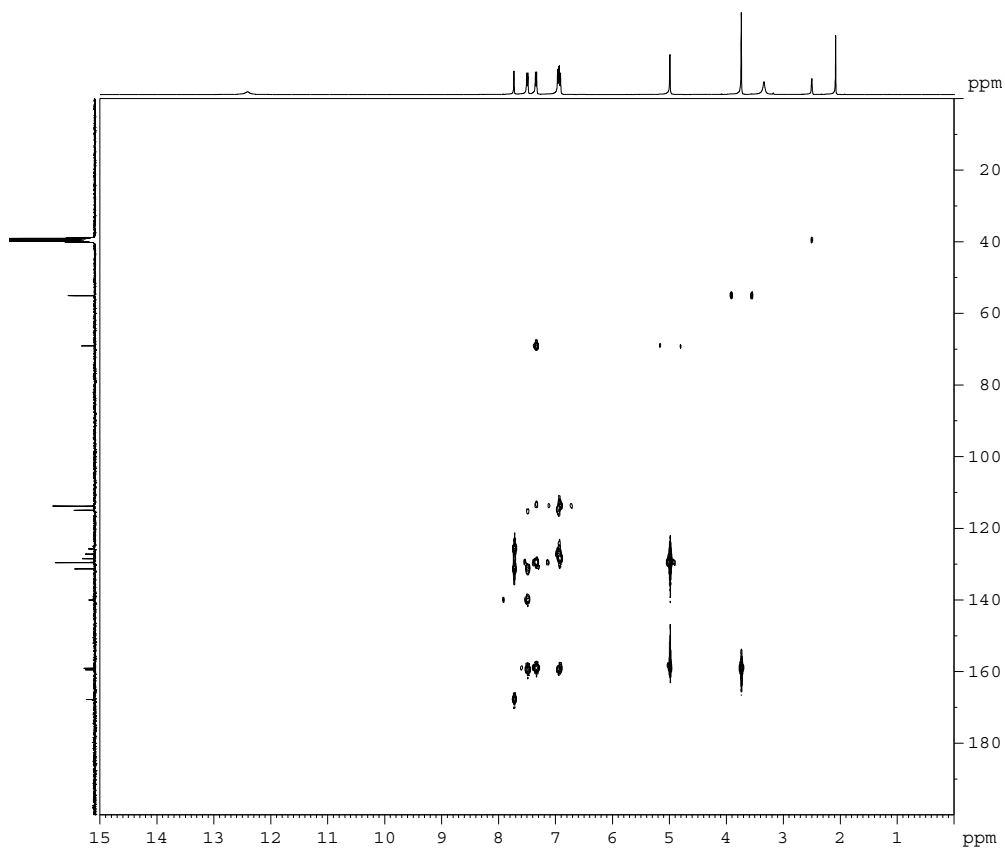

Fig. S14. HMBC spectrum of 2.

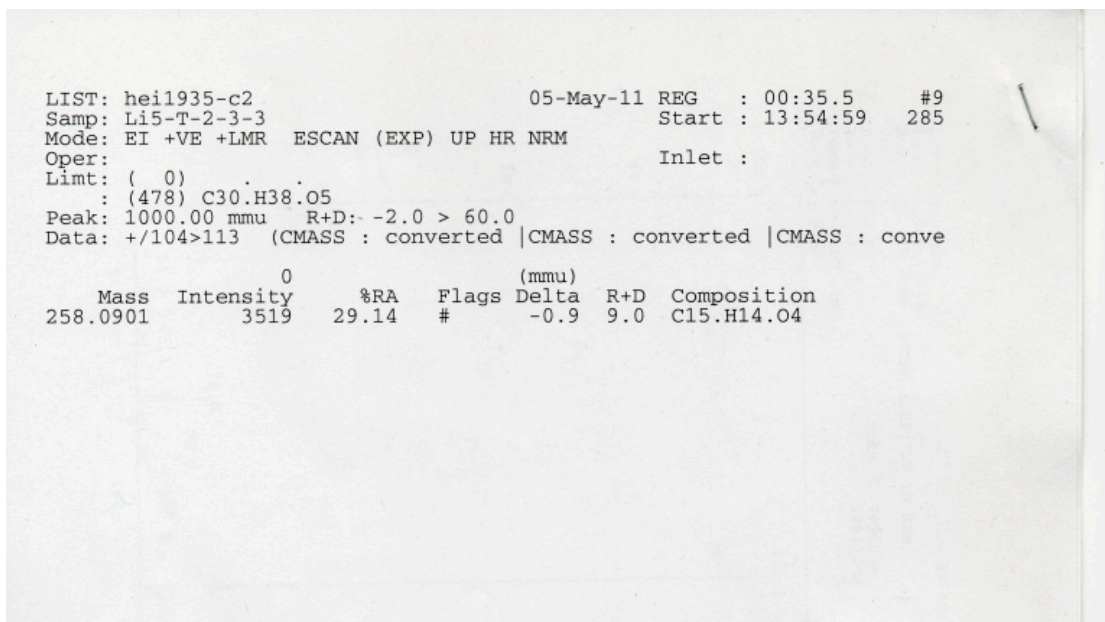

Fig. S15. HR-EI-MS spectrum of 3.



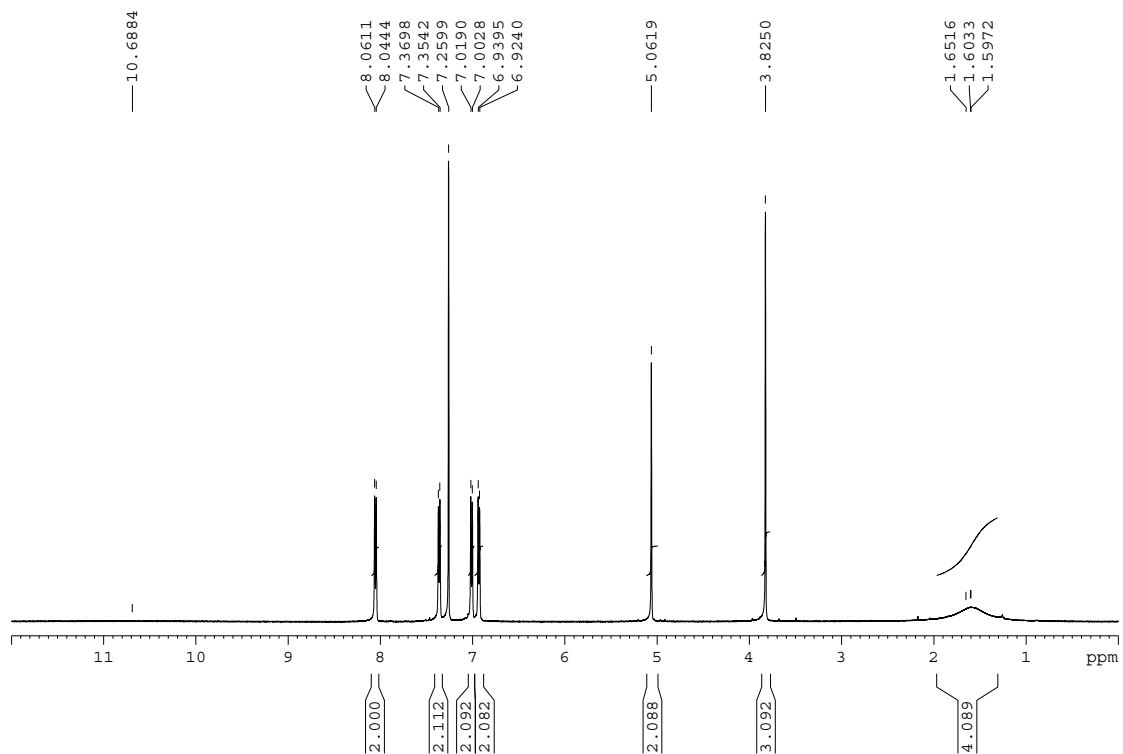

Fig. S16.  $^1\text{H}$ -NMR spectrum of **3** ( $\text{CDCl}_3$ , 500 MHz).

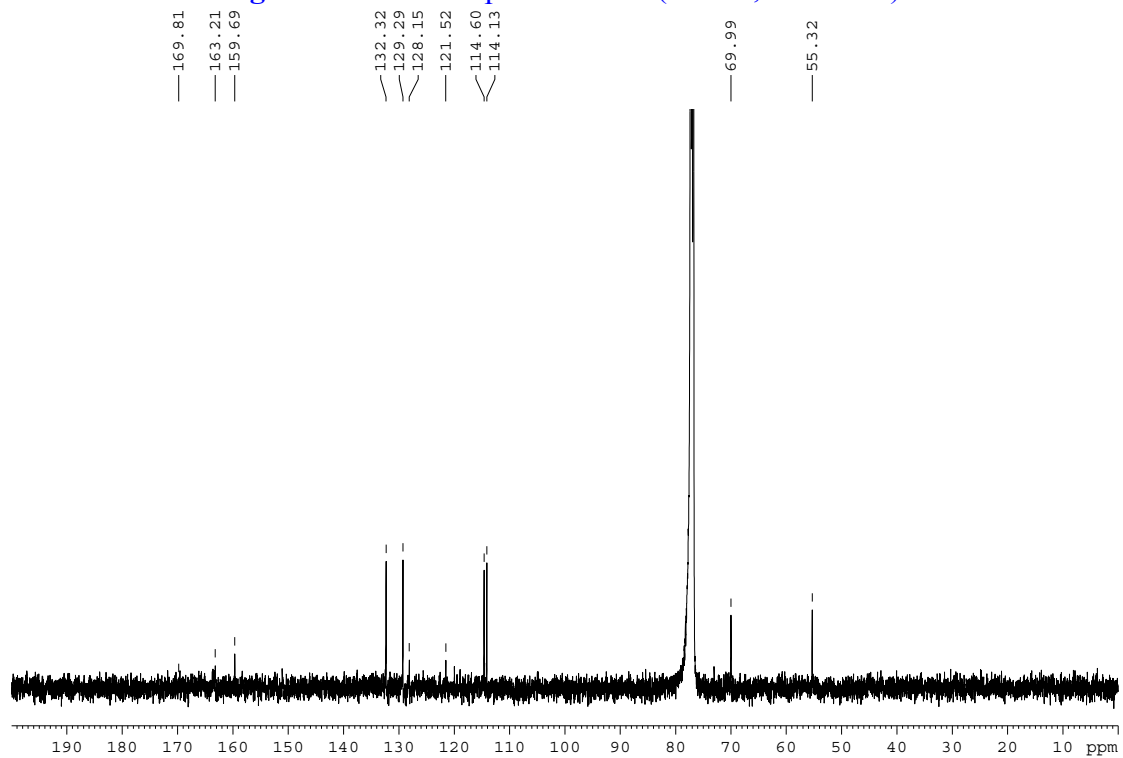

Fig. S17.  $^{13}\text{C}$ -NMR spectrum of **3** ( $\text{CDCl}_3$ , 125 MHz).

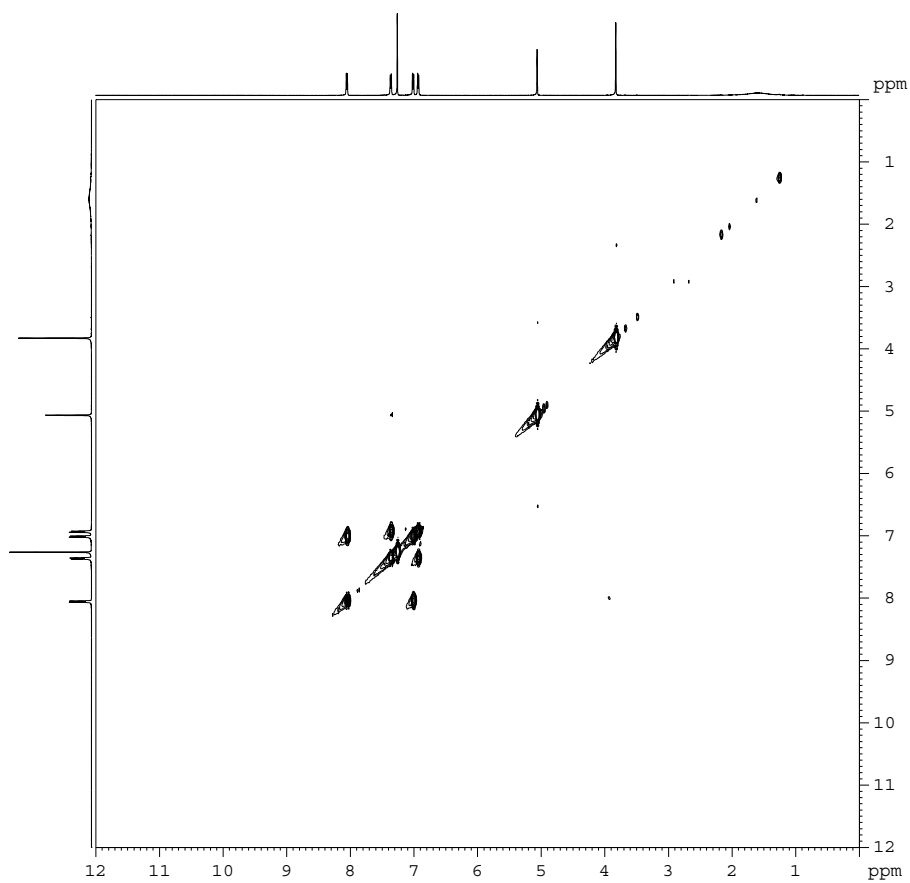

**Fig. S18.**  $^1\text{H}$ - $^1\text{H}$  COSY spectrum of **3**.

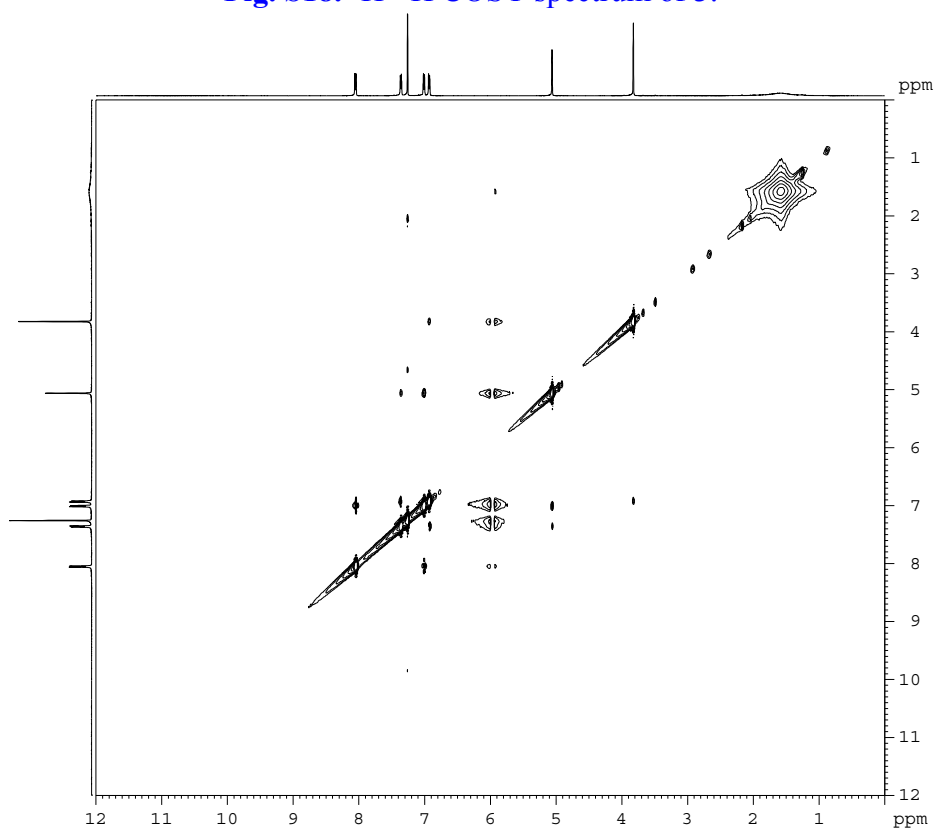

**Fig. S19.** NOESY spectrum of **3**.

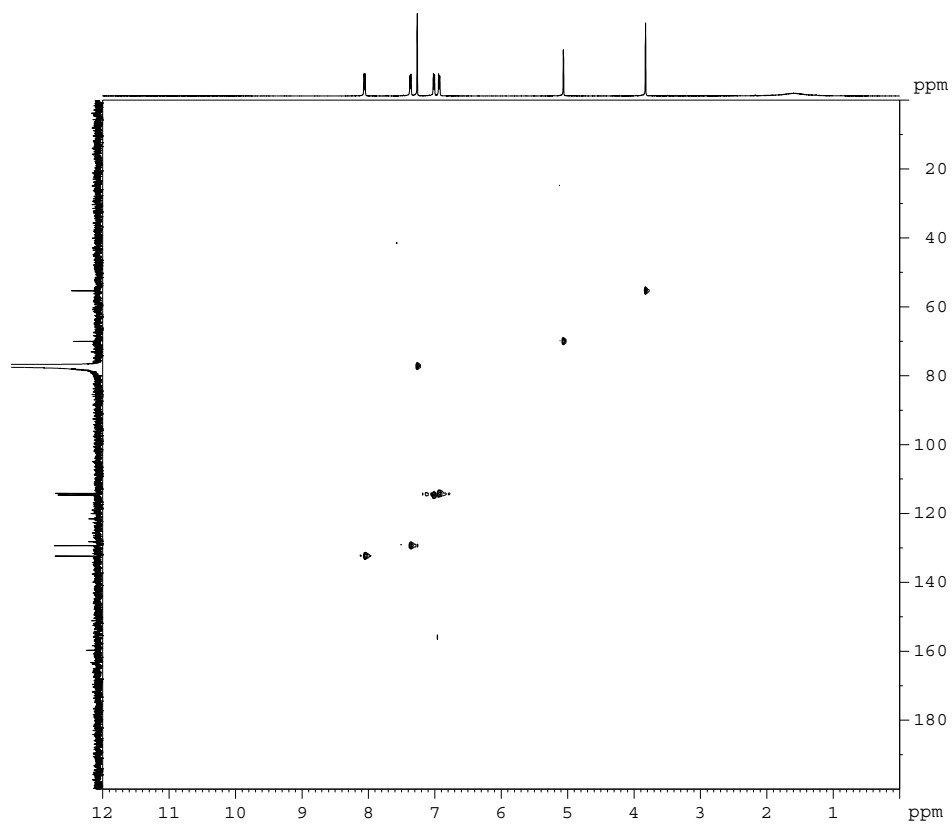

**Fig. S20.** HSQC spectrum of **3**.

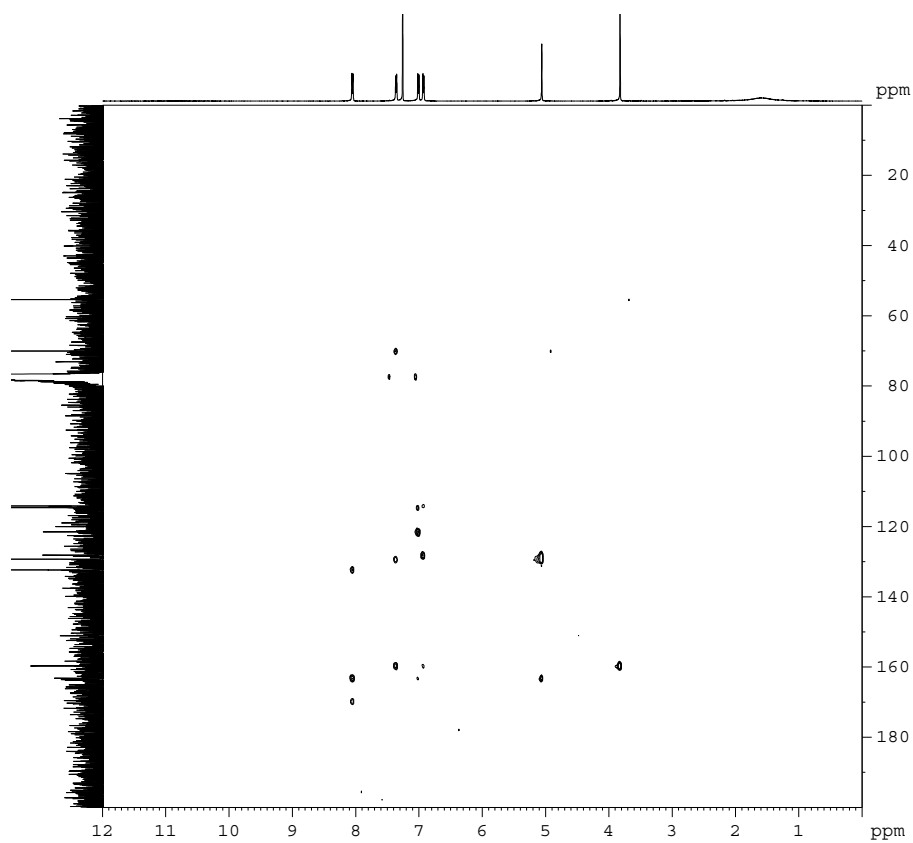

**Fig. S21.** HMBC spectrum of **3**.
